# Supplementary material for: Genome investigation suggests MdSHN3, an APETALA2-domain transcription factor gene, to be a positive regulator of apple fruit cuticle formation and an inhibitor of russet development
Source: PubMed Central journal article supplement (PMC4623677; doi:10.1093/jxb/erv366), 2015-07-28
Supplement: supp_erv366_jexbot150680_file001.pdf [file supp_erv366_jexbot150680_file001.pdf]

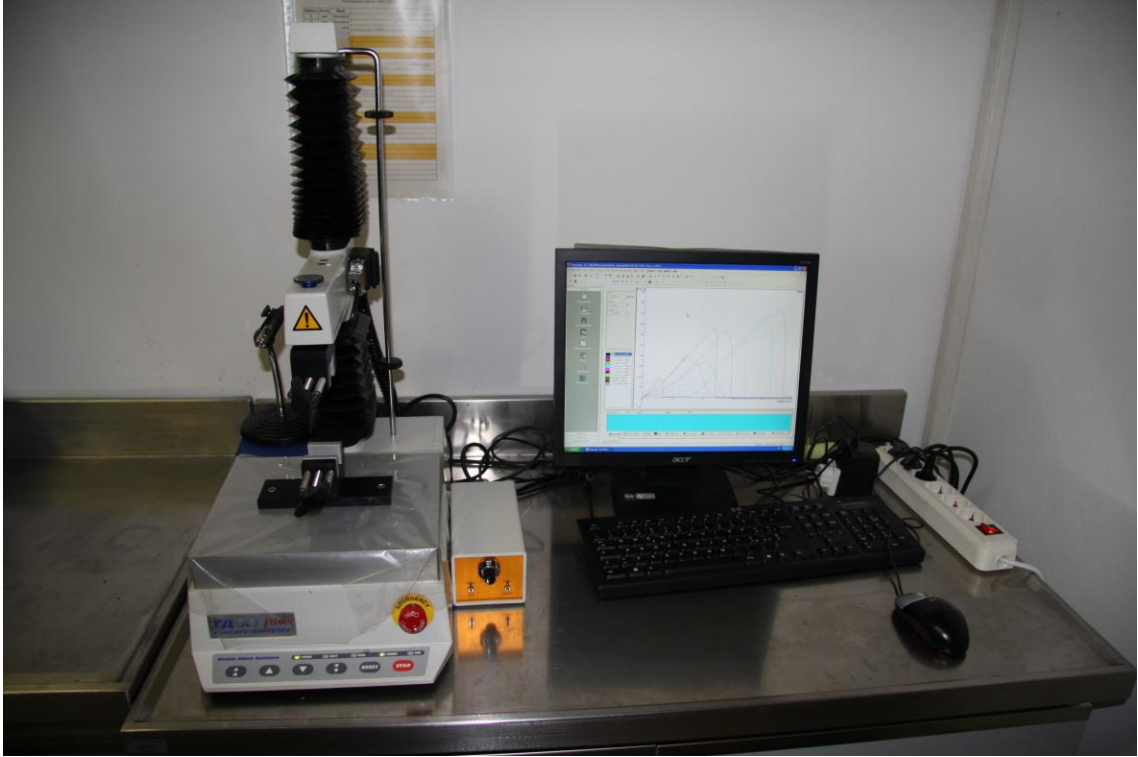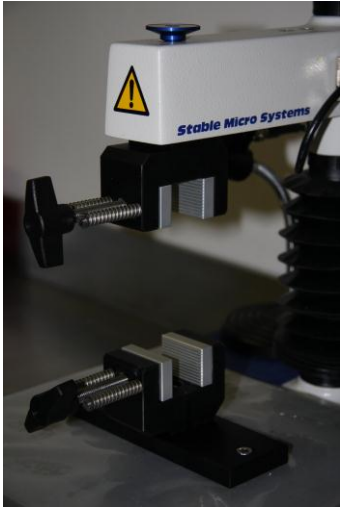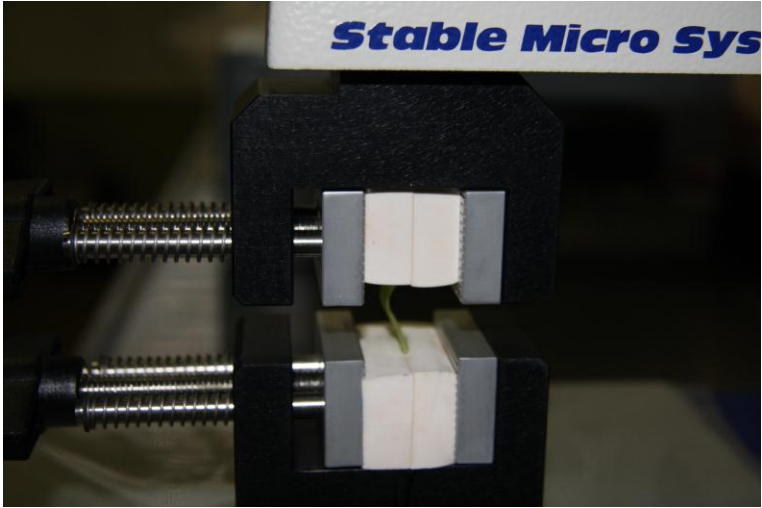

Supp. Figure 1  
Lashbrooke *et al.*, (2015)

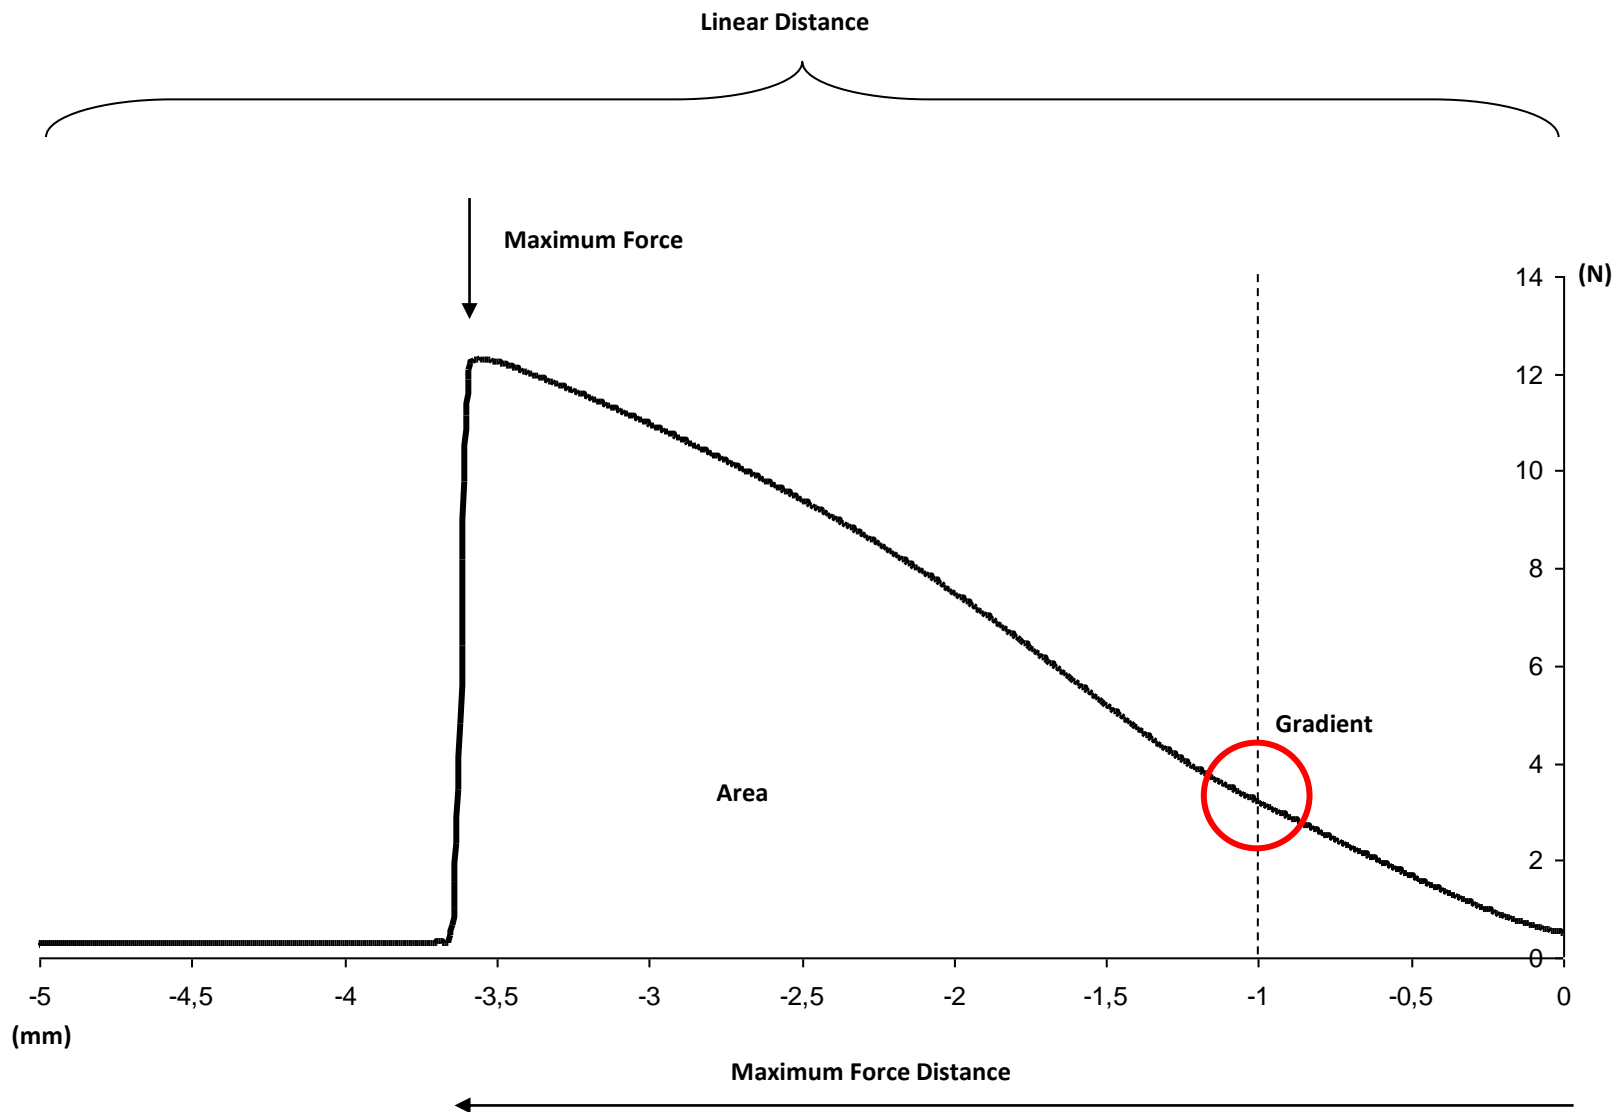

Supp. Figure 2  
Lashbrooke *et al.*, (2015)

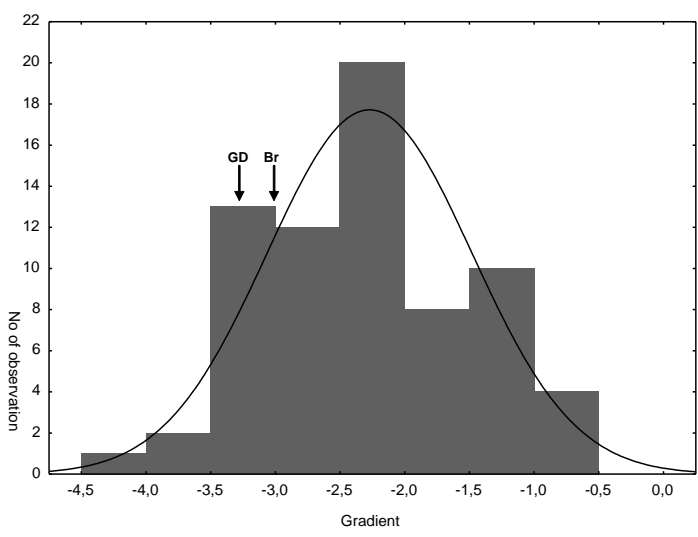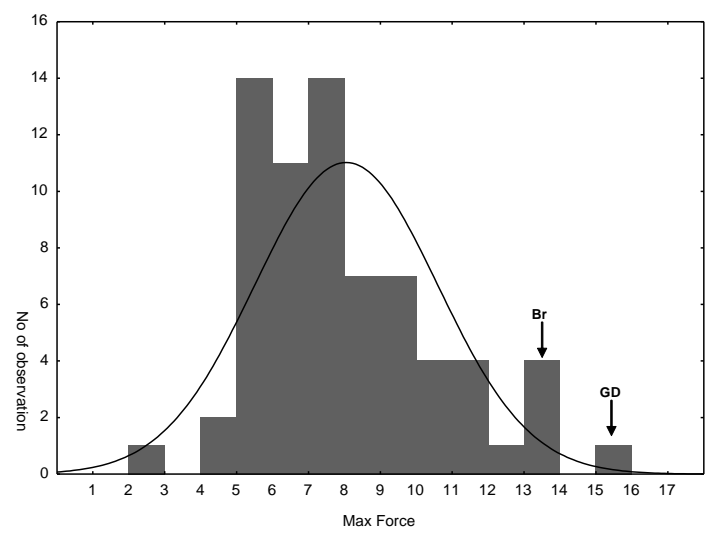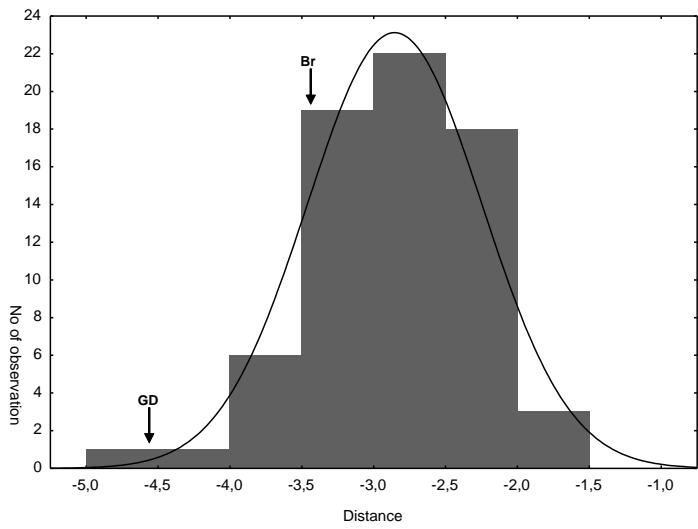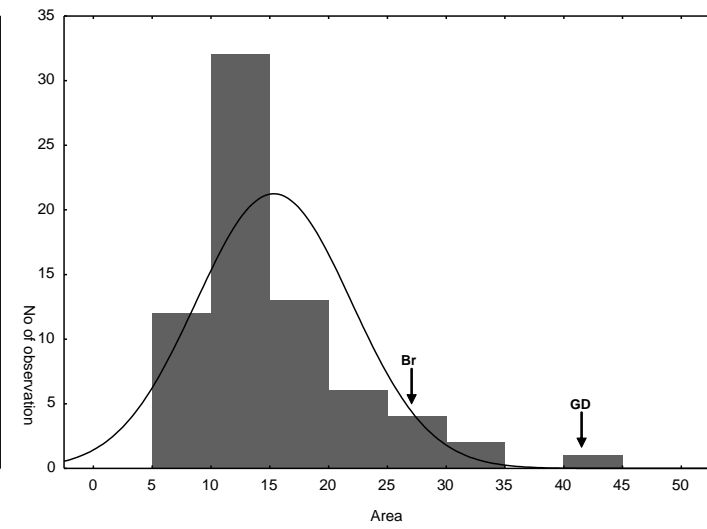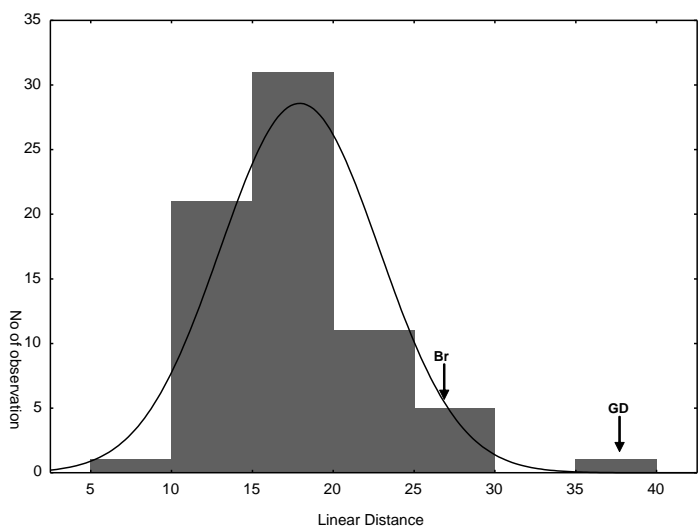

Supp. Figure 3  
Lashbrooke *et al.*, (2015)

**Chr 2**

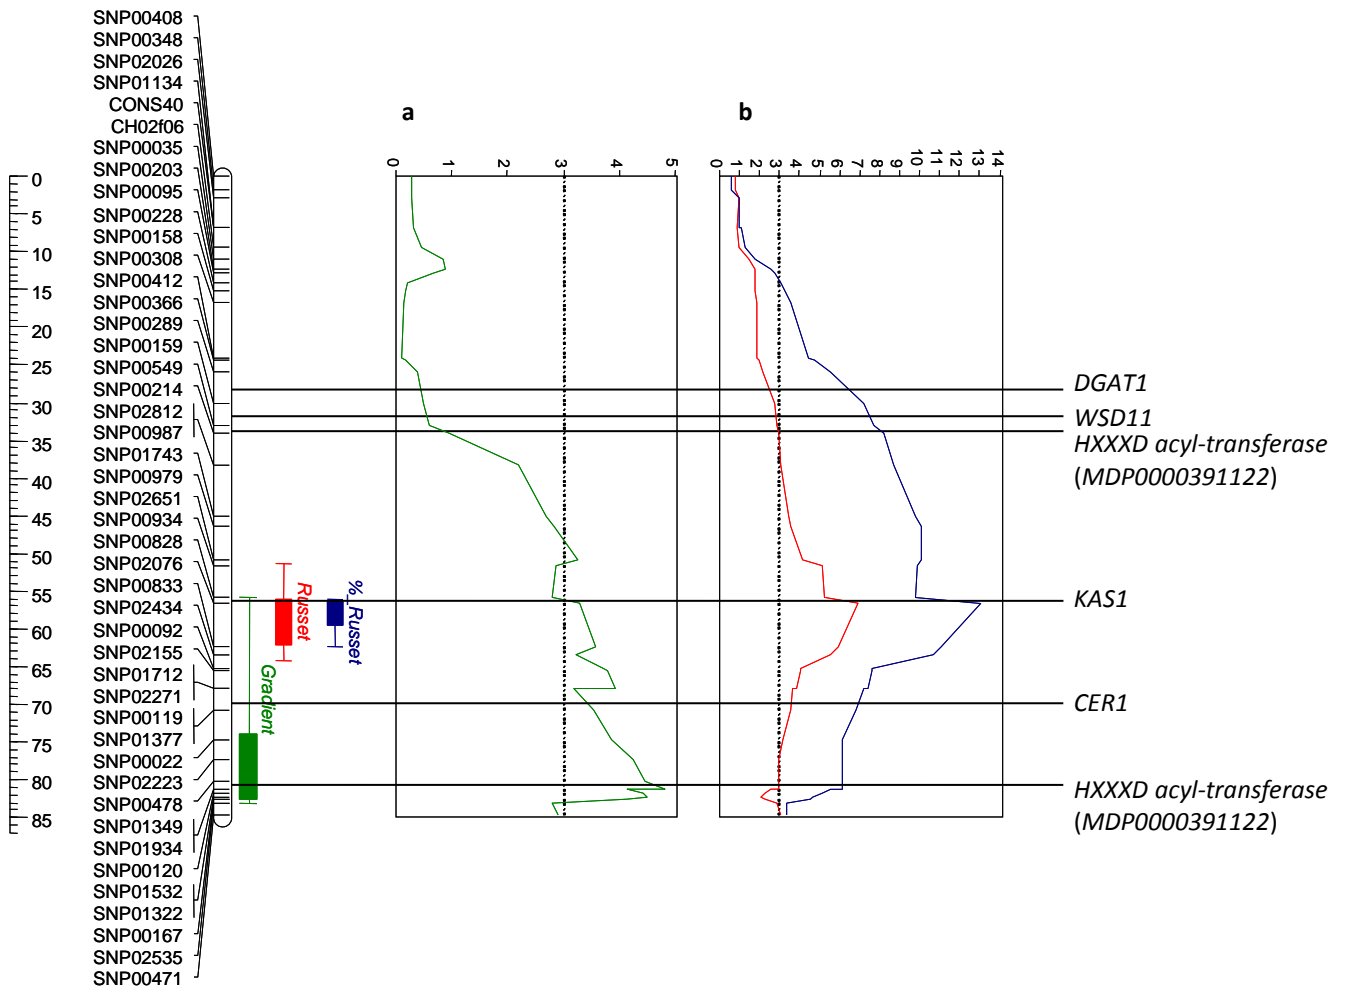

**Chr 15**

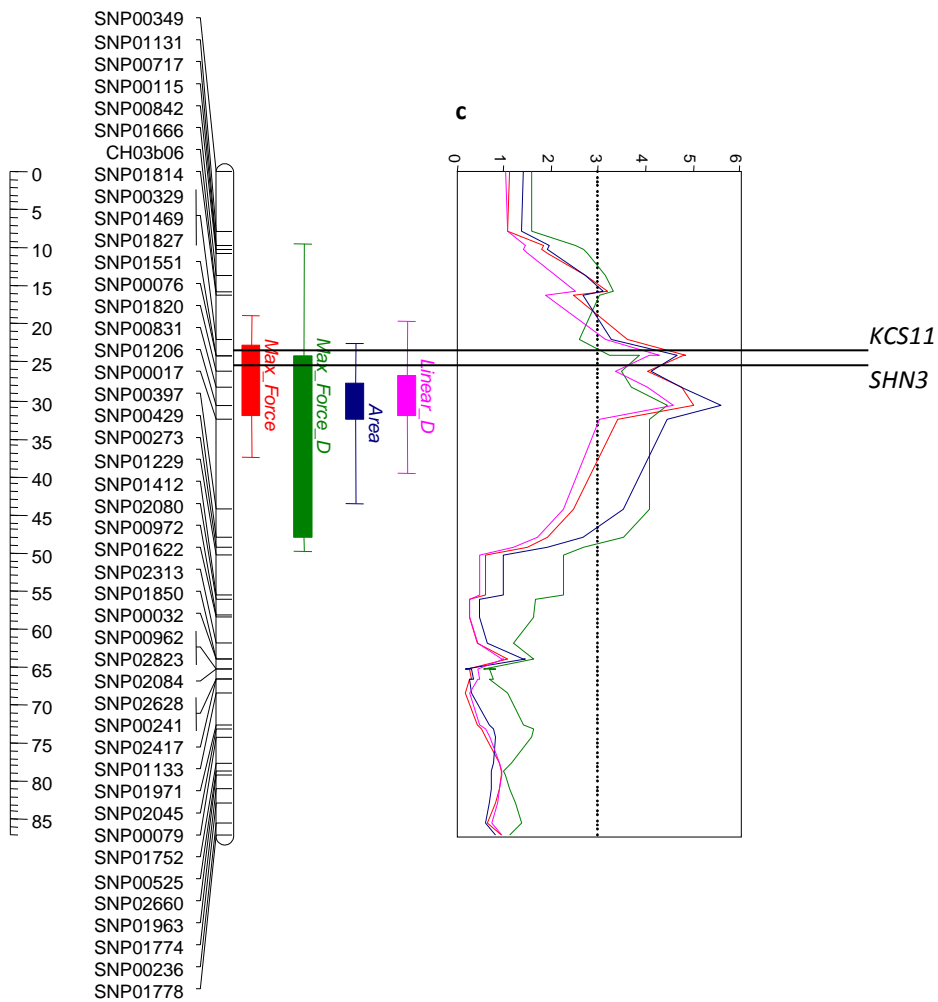

**A**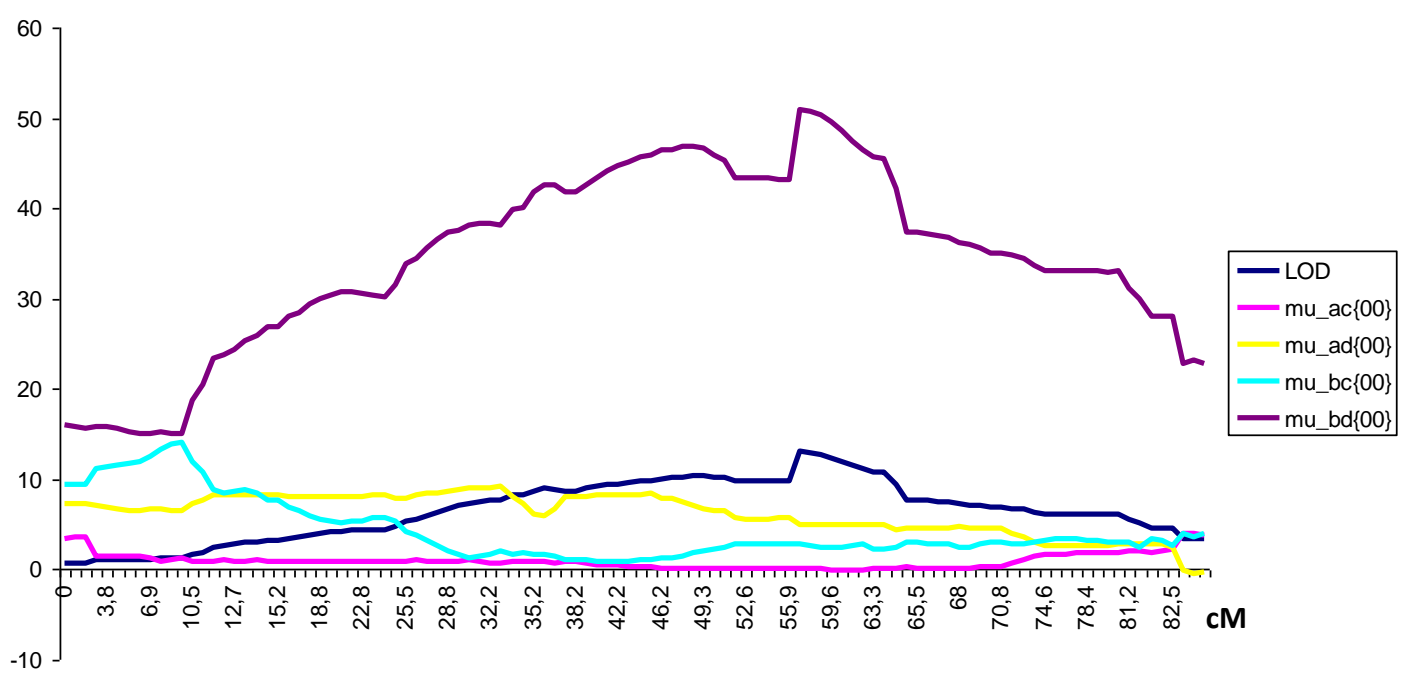**B**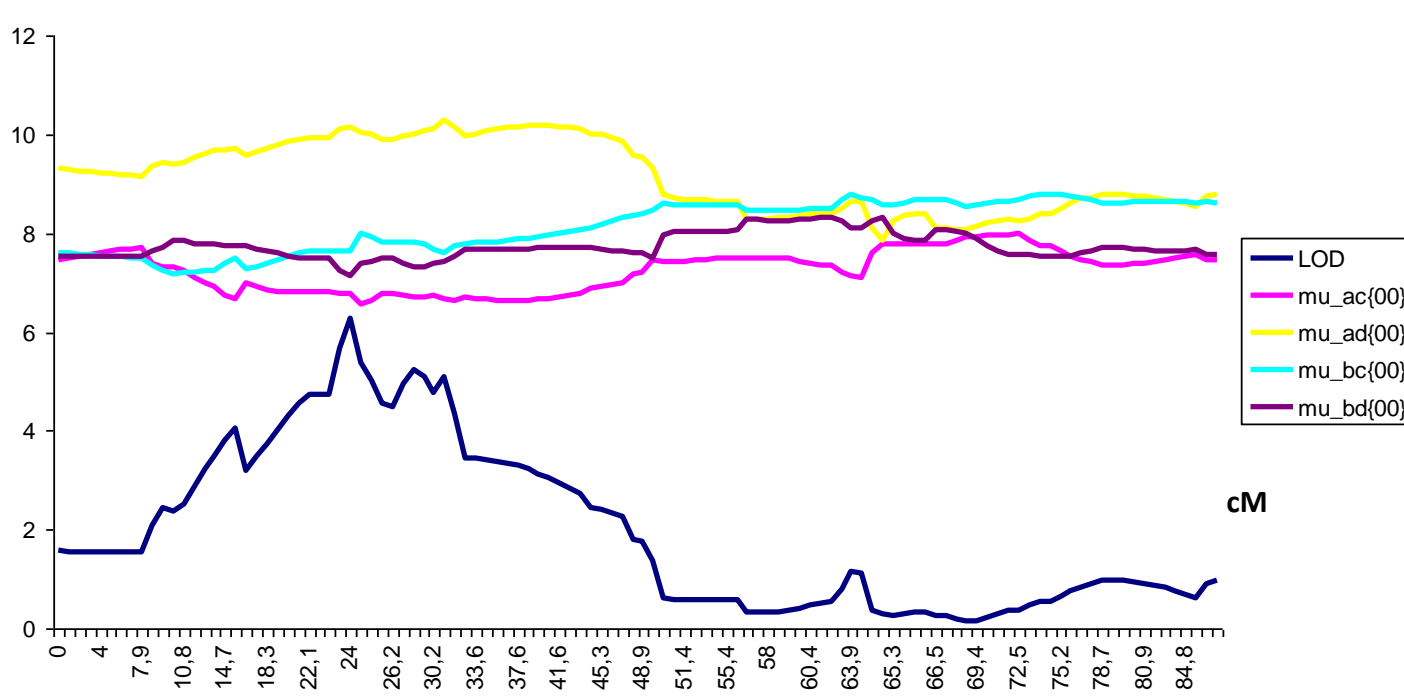

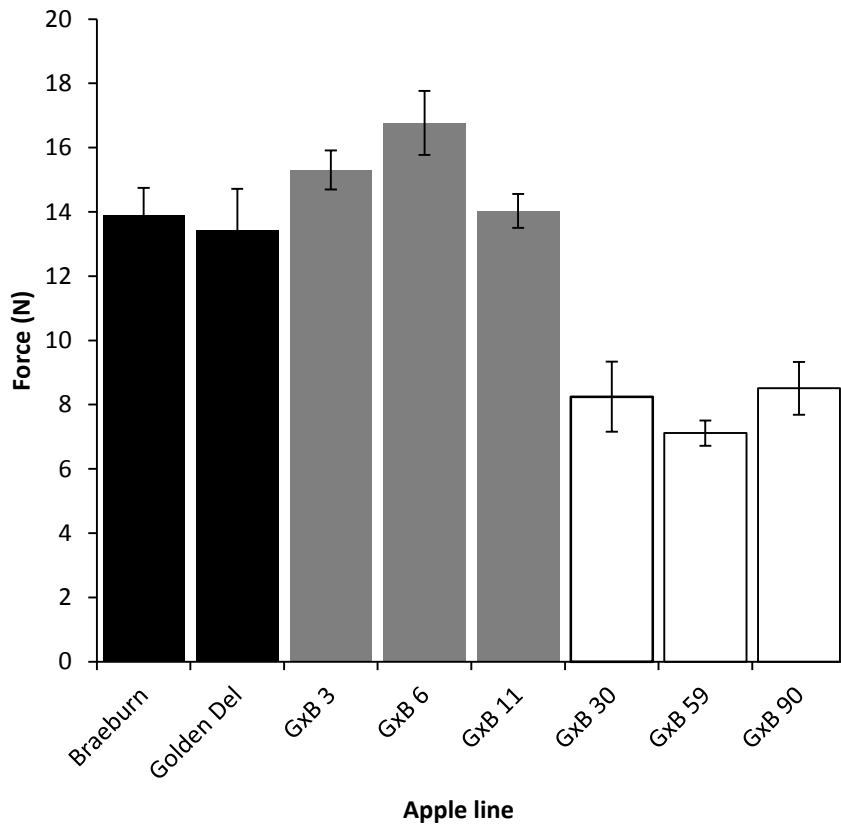

Supp. Figure 6  
Lashbrooke *et al.*, (2015)

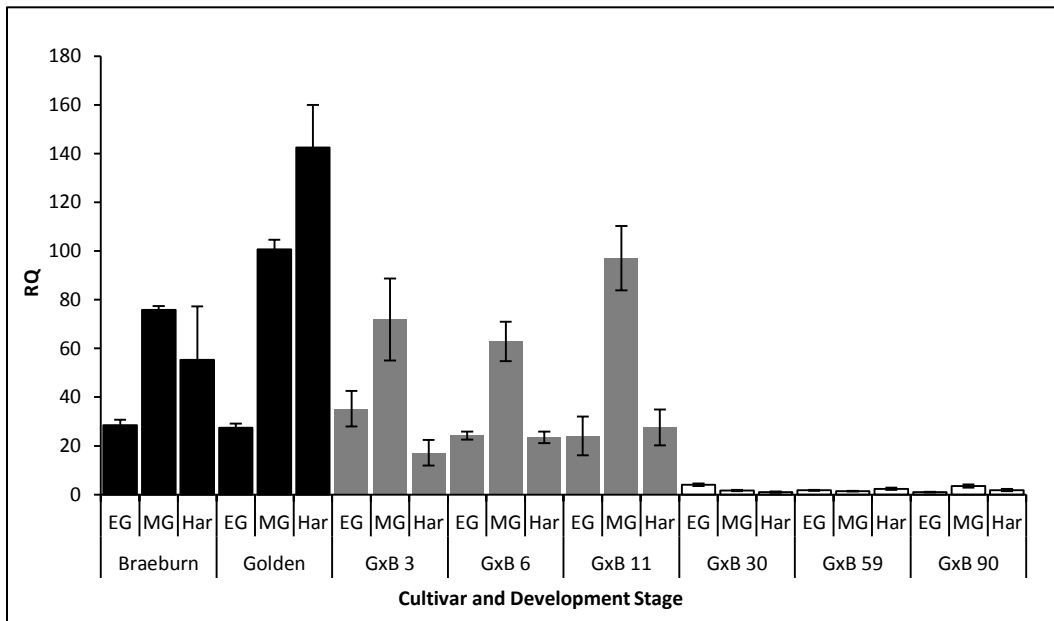

Supp. Figure 7  
Lashbrooke *et al.*, (2015)

**Supplementary Table 1.** Oligos used in this study to measure gene expression

| <b>Gene ID</b> | <b>Name</b>                 | <b>Forward primer</b>    | <b>Reverse primer</b>    |
|----------------|-----------------------------|--------------------------|--------------------------|
| MDP0000287191  | WSD11                       | CTCTGCAATGCATGTTTCAGCAT  | GGTCATGTGAGATGTTGCTTCTGT |
| MDP0000250127  | KAS1                        | TGAAGAAGCAACATGAGGTTAACG | GGCTCAGTGCTCCCTTTCCT     |
| MDP0000069348  | CER1                        | TGATTGGCCATGGAAACCA      | AATGACCCAAGGAGCCATGAT    |
| MDP0000938736  | KCS11                       | CTGTTATACAGGTGCCTCCCAATC | AGCTGATCAAGGGCACCAAA     |
| MDP0000178263  | SHN3                        | CTGCCACCGACCAAAACACT     | TGGGTCTTTGCAGCATTTC      |
| MDP0000729533  | HXXXD-type acyl-transferase | GATGTGGTGCCTCTCGTAGCA    | TGGCGGTGAGTTTAGGAAATCTAG |
| MDP0000391122  | HXXXD-type acyl-transferase | GCCAGTCAAGGATCCTCACAAG   | CCCGCCACATTCAAAGAAGTT    |
| MDP0000297929  | DGAT1                       | GACGGCAATTCCTTGAACGA     | CCGGCGTCGCAGATTTT        |
